# Supplementary material for: MiR-378 and MiR-1827 Regulate Tumor Invasion, Migration and Angiogenesis in Human Lung Adenocarcinoma by Targeting RBX1 and CRKL, Respectively
Source: PubMed Central journal article supplement — J Cancer. 2018 Jan 1;9(2):331–45. doi: 10.7150/jca.18188 (PMC5771341; doi:10.7150/jca.18188), 2018-01-01
Supplement: jcav09p0331s1.pdf [file jcav09p0331s1.pdf]

Figure S1

A

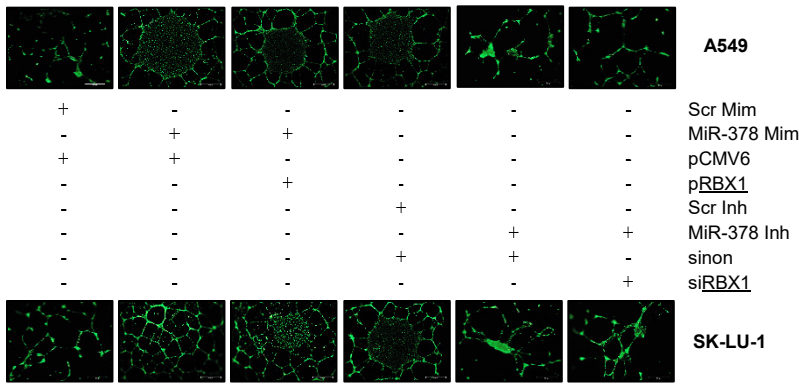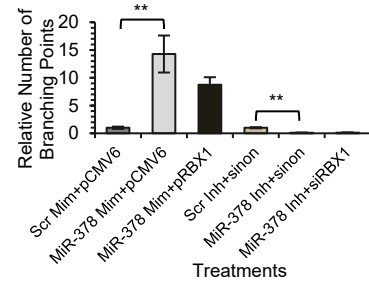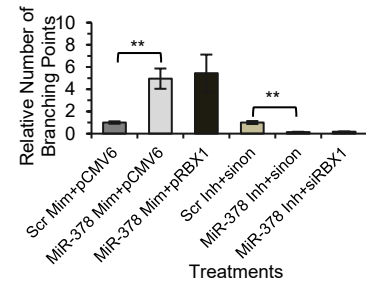

B

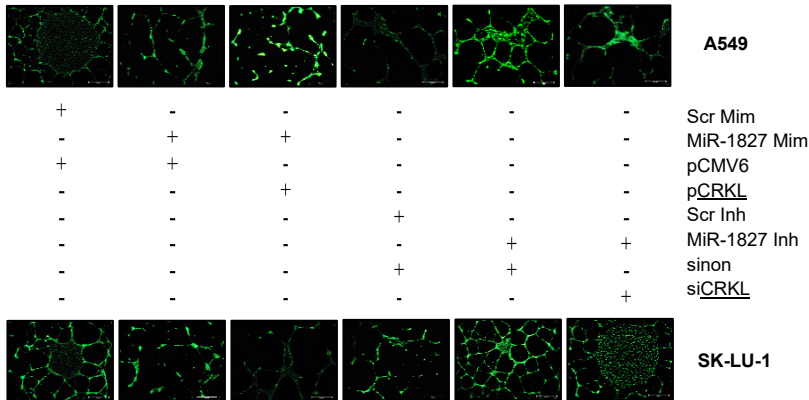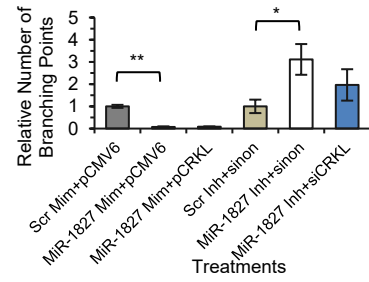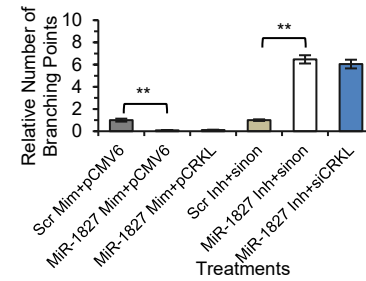

Figure S1: RBX1 and CRKL are not main players in miR-378-induced and miR-1827-repressed angiogenesis. (A) Angiogenic effects of RBX1 overexpression and silencing in A549 and SK-LU-1 cells. (B) Angiogenic effects of CRKL overexpression and silencing in A549 and SK-LU-1 cells.

**Table S1:** MiR-378 gene targets predicted by DIANA-microT-CDS and TargetScan and annotated by DAVID.

| Gene Symbol | Gene Name                                                        | DIANA miTG Score | TargetScan Total Context Score | DAVID Functional Annotation                                                 |
|-------------|------------------------------------------------------------------|------------------|--------------------------------|-----------------------------------------------------------------------------|
| ERBB4       | v-Erb-B2 avian erythroblastic leukemia viral oncogene homolog 4  | 0.715            | -0.100                         | ErbB signaling pathway                                                      |
| NKX3-1      | NK3 homeobox 1                                                   | 0.895            | -0.810                         | Pathways in cancer                                                          |
| PAX8        | Paired box 8                                                     | 0.851            | -0.160                         | Pathways in cancer                                                          |
| PLA2G12A    | Phospholipase A2, group XIIA                                     | 0.833            | -0.470                         | Ras signaling pathway                                                       |
| RAD51       | RAD51 recombinase                                                | 0.741            | -0.200                         | Pathways in cancer                                                          |
| RAPGEF5     | Rap Guanine nucleotide exchange factor (GEF) 5                   | 0.715            | -0.150                         | Rap1 signaling pathway<br>Ras signaling pathway                             |
| RBX1        | Ring-box 1, E3 ubiquitin protein ligase                          | 0.861            | -0.470                         | HIF-1 signaling pathway<br>Pathways in cancer<br>TGF-beta signaling pathway |
| SKP2        | S-phase kinase-associated protein 2, E3 ubiquitin protein ligase | 0.860            | -0.220                         | Pathways in cancer                                                          |

Putative gene targets were identified using default parameters and filtered by KEGG pathways related to cell invasion, migration and

**Table S2:** MiR-1827 gene targets predicted by DIANA-microT-CDS and TargetScan and annotated by DAVID.

| <b>Gene Symbol</b> | <b>Gene Name</b>                                                | <b>DIANA miTG Score</b> | <b>TargetScan Total Context Score</b> | <b>DAVID Functional Annotation</b>               |
|--------------------|-----------------------------------------------------------------|-------------------------|---------------------------------------|--------------------------------------------------|
| ADCY2              | Adenylate cyclase 2 (brain)                                     | 0.796                   | -0.160                                | Pathways in cancer                               |
| AR                 | Androgen receptor                                               | 0.940                   | -0.290                                | Pathways in cancer                               |
| ATM                | Ataxia telangiectasia mutated                                   | 0.770                   | -0.150                                | p53 signaling pathway                            |
| BBC3               | BCL2 binding component 3                                        | 0.922                   | -0.160                                | Hippo signaling pathway<br>p53 signaling pathway |
| BCL2L1             | BCL2-like 1                                                     | 0.819                   | -0.240                                | Pathways in cancer                               |
| BCR                | Breakpoint cluster region                                       | 0.779                   | -0.090                                | Pathways in cancer                               |
| BDKRB2             | Bradykinin receptor B2                                          | 0.732                   | -0.520                                | Pathways in cancer                               |
| CAMK2A             | Calcium/ calmodulin-dependent protein kinase II alpha           | 0.807                   | -0.240                                | ErbB signaling pathway<br>Wnt signaling pathway  |
| CCNG1              | Cyclin G1                                                       | 0.925                   | -0.400                                | p53 signaling pathway                            |
| CDKN1B             | Cyclin-dependent kinase inhibitor 1B (p27, Kip1)                | 0.796                   | -0.260                                | ErbB signaling pathway<br>Pathways in cancer     |
| CRB2               | Crumbs homolog 2 (Drosophila)                                   | 0.723                   | -0.100                                | Hippo signaling pathway                          |
| CRKL               | v-CRK avian sarcoma virus CT10 oncogene homolog-like            | 0.899                   | -0.320                                | ErbB signaling pathway<br>Pathways in cancer     |
| CYCS               | Cytochrome c, somatic                                           | 0.826                   | -0.700                                | p53 signaling pathway<br>Pathways in cancer      |
| E2F2               | E2F transcription factor 2                                      | 0.742                   | -0.690                                | Pathways in cancer                               |
| ERBB4              | v-Erb-B2 avian erythroblastic leukemia viral oncogene homolog 4 | 0.890                   | -0.100                                | ErbB signaling pathway                           |

|              |                                                                             |       |        |                                                                                                  |
|--------------|-----------------------------------------------------------------------------|-------|--------|--------------------------------------------------------------------------------------------------|
| FAS          | Fas cell surface death receptor                                             | 0.754 | -0.300 | p53 signaling pathway<br>Pathways in cancer                                                      |
| FGF18        | Fibroblast growth factor 18                                                 | 1.000 | -0.640 | Pathways in cancer                                                                               |
| FGF20        | Fibroblast growth factor 20                                                 | 0.734 | -0.250 | Pathways in cancer                                                                               |
| FZD3         | Frizzled family receptor 3                                                  | 0.845 | -0.180 | Hippo signaling pathway<br>Pathways in cancer<br>Wnt signaling pathway                           |
| FZD5         | Frizzled family receptor 5                                                  | 0.759 | -0.200 | Hippo signaling pathway<br>Pathways in cancer<br>Wnt signaling pathway                           |
| GRB2         | Growth factor receptor-bound protein 2                                      | 0.716 | -0.430 | ErbB signaling pathway<br>Pathways in cancer                                                     |
| GSK3 $\beta$ | Glycogen synthase kinase 3 beta                                             | 0.982 | -0.330 | ErbB signaling pathway<br>Hippo signaling pathway<br>Pathways in cancer<br>Wnt signaling pathway |
| IGF1         | Insulin-like growth factor 1 (somatomedin C)                                | 0.845 | -0.780 | p53 signaling pathway<br>Pathways in cancer                                                      |
| IKBKG        | Inhibitor of kappa light polypeptide gene enhancer in B-cells, kinase gamma | 0.714 | -0.640 | Pathways in cancer                                                                               |
| LAMC2        | Laminin, gamma 2                                                            | 0.816 | -0.430 | Pathways in cancer                                                                               |
| LIMD1        | LIM domains containing 1                                                    | 0.800 | -0.300 | Hippo signaling pathway                                                                          |
| LLGL2        | Lethal giant larvae homolog 2 (Drosophila)                                  | 0.802 | -0.290 | Hippo signaling pathway                                                                          |
| LRP6         | Low density lipoprotein receptor-related protein 6                          | 0.969 | -0.170 | Wnt signaling pathway                                                                            |

|         |                                                                                        |       |        |                                                                                                  |
|---------|----------------------------------------------------------------------------------------|-------|--------|--------------------------------------------------------------------------------------------------|
| MDM2    | MDM2 oncogene, E3 ubiquitin protein ligase                                             | 0.992 | -0.400 | p53 signaling pathway<br>Pathways in cancer                                                      |
| MDM4    | Mdm4 p53 binding protein homolog (mouse)                                               | 0.882 | -0.780 | p53 signaling pathway                                                                            |
| MITF    | Microphthalmia-associated transcription factor                                         | 0.801 | -0.290 | Pathways in cancer                                                                               |
| MYC     | v-Myc avian myelocytomatosis viral oncogene homolog                                    | 1.000 | -0.580 | ErbB signaling pathway<br>Hippo signaling pathway<br>Pathways in cancer<br>Wnt signaling pathway |
| NCOA4   | Nuclear receptor coactivator 4                                                         | 0.715 | -0.260 | Pathways in cancer                                                                               |
| NF2     | Neurofibromin 2 (merlin)                                                               | 0.871 | -0.350 | Hippo signaling pathway                                                                          |
| NFATC3  | Nuclear factor of activated T-cells, cytoplasmic, calcineurin-dependent 3              | 0.863 | -0.420 | Wnt signaling pathway                                                                            |
| NFATC4  | Nuclear factor of activated T-cells, cytoplasmic, calcineurin-dependent 4              | 0.842 | -0.820 | Wnt signaling pathway                                                                            |
| NKD1    | Naked cuticle homolog 1 (Drosophila)                                                   | 0.720 | -0.170 | Wnt signaling pathway                                                                            |
| PAK1    | p21 protein (Cdc42/ Rac)-activated kinase 1                                            | 0.739 | -0.110 | ErbB signaling pathway                                                                           |
| PLCG1   | Phospholipase C, gamma 1                                                               | 0.803 | -0.240 | ErbB signaling pathway<br>Pathways in cancer                                                     |
| PLEKHG5 | Pleckstrin homology domain containing, family G (with RhoGEF domain) member 5          | 0.923 | -0.520 | Pathways in cancer                                                                               |
| PPP2R2A | Protein phosphatase 2, regulatory subunit B, alpha                                     | 0.802 | -0.330 | Hippo signaling pathway                                                                          |
| PTGS2   | Prostaglandin-endoperoxide synthase 2 (prostaglandin G/ H synthase and cyclooxygenase) | 0.831 | -0.160 | Pathways in cancer                                                                               |

|        |                                                                                  |       |        |                                                                        |
|--------|----------------------------------------------------------------------------------|-------|--------|------------------------------------------------------------------------|
| RALBP1 | RALBP1 associated EPS domain containing 2                                        | 0.700 | -0.230 | Pathways in cancer                                                     |
| RCHY1  | Ring finger and CHY zinc finger domain containing 1, E3 ubiquitin protein ligase | 0.848 | -0.160 | p53 signaling pathway                                                  |
| RXRB   | Retinoid X receptor, beta                                                        | 0.700 | -0.100 | Pathways in cancer                                                     |
| STAT3  | Signal transducer and activator of transcription 3 (acute-phase response factor) | 0.703 | -0.140 | Pathways in cancer                                                     |
| STAT5B | Signal transducer and activator of transcription 5B                              | 0.966 | -0.450 | ErbB signaling pathway<br>Pathways in cancer                           |
| STK36  | Serine/threonine kinase 36                                                       | 0.884 | -0.200 | Pathways in cancer                                                     |
| STK4   | Serine/threonine kinase 4                                                        | 0.759 | -0.140 | Pathways in cancer                                                     |
| SUFU   | Suppressor of fused homolog (Drosophila)                                         | 0.710 | -0.340 | Pathways in cancer                                                     |
| THBS1  | Thrombospondin 1                                                                 | 0.981 | -0.290 | p53 signaling pathway                                                  |
| TP73   | Tumor protein p73                                                                | 0.721 | -0.300 | Hippo signaling pathway<br>p53 signaling pathway                       |
| TPM3   | Tropomyosin 3                                                                    | 0.885 | -0.560 | Pathways in cancer                                                     |
| VANGL2 | VANGL planar cell polarity protein 2                                             | 0.754 | -0.180 | Wnt signaling pathway                                                  |
| VHL    | von Hippel-Lindau tumor suppressor, E3 ubiquitin protein ligase                  | 0.938 | -0.520 | Pathways in cancer                                                     |
| WNT2B  | Wingless-type MMTV integration site family, member 2B                            | 0.721 | -0.220 | Hippo signaling pathway<br>Pathways in cancer<br>Wnt signaling pathway |
| WNT3A  | Wingless-type MMTV integration site family, member 3A                            | 0.849 | -0.410 | Hippo signaling pathway<br>Pathways in cancer<br>Wnt signaling pathway |

|       |                                                       |       |        |                                                                        |
|-------|-------------------------------------------------------|-------|--------|------------------------------------------------------------------------|
| WNT5B | Wingless-type MMTV integration site family, member 5B | 0.852 | -0.450 | Hippo signaling pathway<br>Pathways in cancer<br>Wnt signaling pathway |
| WNT9B | Wingless-type MMTV integration site family, member 9B | 0.720 | -0.510 | Hippo signaling pathway<br>Pathways in cancer<br>Wnt signaling pathway |

Putative gene targets were identified using default parameters and filtered by KEGG pathways related to cell invasion, migration and angiogenesis.
